# Supplementary material for: Bayesian phylodynamics of avian influenza A virus H9N2 in Asia with time-dependent predictors of migration
Source: PubMed Central journal article supplement (PMC6684064; doi:10.1371/journal.pcbi.1007189), 2019-08-06
Supplement: pcbi.1007189.s004.pdf [file pcbi.1007189.s004.pdf]

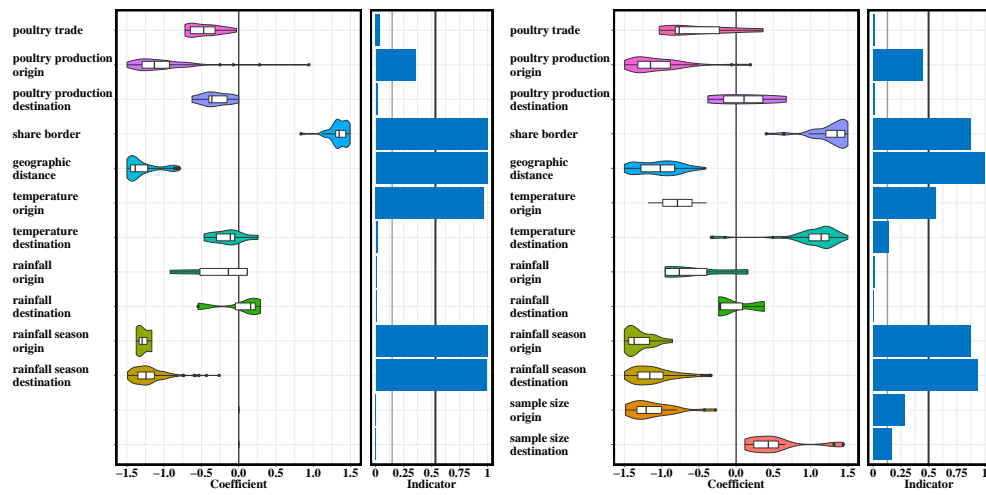

(a) Without sample size.

(b) With sample size.

**S4 Fig. Time-independent predictors of migration rates of H9N2 between 12 locations in Asia inferred by 526 sequences under MAS-COT.** The 50% prior mass was specified on no predictors being included in the GLM. Parameters and figure elements are the same as in S3 Fig.
