# Supplementary material for: Bayesian phylodynamics of avian influenza A virus H9N2 in Asia with time-dependent predictors of migration
Source: PubMed Central journal article supplement (PMC6684064; doi:10.1371/journal.pcbi.1007189), 2019-08-06
Supplement: pcbi.1007189.s008.pdf [file pcbi.1007189.s008.pdf]

**S1 Table. Different scenarios of the 10 migration rate GLMs.**

| Phylogeographic model | Predictors       |                     | Dataset          |
|-----------------------|------------------|---------------------|------------------|
| MASCOT                | Time dependent   | include sample size | 526 HA sequences |
| MASCOT                | Time dependent   | exclude sample size | 526 HA sequences |
| MASCOT                | Time independent | include sample size | 526 HA sequences |
| MASCOT                | Time independent | exclude sample size | 526 HA sequences |
| MASCOT                | Time dependent   | include sample size | 385 HA sequences |
| MASCOT                | Time dependent   | exclude sample size | 385 HA sequences |
| DTA                   | Time independent | include sample size | 526 HA sequences |
| DTA                   | Time independent | exclude sample size | 526 HA sequences |
| DTA                   | Time independent | include sample size | 385 HA sequences |
| DTA                   | Time independent | exclude sample size | 385 HA sequences |
