# Supplementary material for: Bayesian phylodynamics of avian influenza A virus H9N2 in Asia with time-dependent predictors of migration
Source: PubMed Central journal article supplement (PMC6684064; doi:10.1371/journal.pcbi.1007189), 2019-08-06
Supplement: pcbi.1007189.s009.pdf [file pcbi.1007189.s009.pdf]

**S2 Table. Predictors considered to inform H9N2 migration rates in GLMs.**

| Predictor                      | Predictor description                                                                                                                      | Temporal information | If included in GLMs |
|--------------------------------|--------------------------------------------------------------------------------------------------------------------------------------------|----------------------|---------------------|
| poultry trade                  | The number of live poultry (including chickens, ducks and turkeys) was exchanged between locations by trade, log-transformed, standardised | Yearly               | Yes                 |
| poultry production origin      | The number of live poultry production (including chickens, ducks and turkeys) in each origin location, log-transformed, standardised       | Yearly               | Yes                 |
| poultry production destination | The number of live poultry production (including chickens, ducks and turkeys) in each destination location, log-transformed, standardised  | Yearly               | Yes                 |
| share border                   | A binary variable describes if the two locations share border on the continent                                                             | Constant             | Yes                 |
| Geographic distance            | Great circle distances between geographic centroids of locations, log-transformed, standardised                                            | Constant             | Yes                 |
| Temperature origin             | The mean temperature in origin location, log-transformed, standardised                                                                     | Yearly               | Yes                 |
| Temperature destination        | The mean temperature in destination location, log-transformed, standardised                                                                | Yearly               | Yes                 |
| Temperature season origin      | It describes the variation of monthly temperature in origin location, log-transformed, standardised                                        | Yearly               | No                  |
| Temperature season destination | It describes the variation of monthly temperature in destination location, log-transformed, standardised                                   | Yearly               | No                  |
| Rainfall origin                | The total rainfall in origin location, log-transformed, standardised                                                                       | Yearly               | Yes                 |
| Rainfall destination           | The total rainfall in destination location, log-transformed, standardised                                                                  | Yearly               | Yes                 |
| Rainfall season origin         | It describes the variation of monthly rainfall in origin location, log-transformed, standardised                                           | Yearly               | Yes                 |
| Rainfall season destination    | It describes the variation of monthly rainfall in destination location, log-transformed, standardised                                      | Yearly               | Yes                 |
| Sample size origin             | The number of H9N2 virus isolates with full-length HA genes in the origin region, log-transformed, standardised                            | Yearly               | Dependent           |
| Sample size destination        | The number of H9N2 virus isolates with full-length HA genes in the destination region, log-transformed, standardised                       | Yearly               | Dependent           |
| Latitude                       | The latitude of locations geographic centroids, log-transformed, standardised                                                              | Constant             | No                  |
