# Supplementary material for: Bayesian phylodynamics of avian influenza A virus H9N2 in Asia with time-dependent predictors of migration
Source: PubMed Central journal article supplement (PMC6684064; doi:10.1371/journal.pcbi.1007189), 2019-08-06
Supplement: pcbi.1007189.s012.pdf [file pcbi.1007189.s012.pdf]

**S5 Table. Details about H9N2 HA nucleotide sequences used in our analyses.** In the column “Label”, D1 points to sequences exclusively in the data set with 526 HA genes; D2 points to sequences simultaneously in both data sets with 526 and 385 HA genes; G1, G9, and Korea represent the representative sequences; C represents outliers in sequences detected by clock test in TempEst; S represents the removed sequences from phylogeographic inference by down-sampling; L represents the removed sequences from phylogeographic inferences in countries with less than 10 isolates in total; P represents the sequences with partial length. All sequences shown here were used in spatiotemporal analysis of H9N2 virus; Sequences labeled by D1, D2 and the representatives were used in phylogeographic reconstructions.

| <b>Accession</b> | <b>Location</b> | <b>Date</b> | <b>Host</b> | <b>Label</b> | <b>Database</b> |
|------------------|-----------------|-------------|-------------|--------------|-----------------|
| AF156378         | Hong Kong       | 1997        | Quail       | G1           | NCBI            |
| AF156376         | Hong Kong       | 1997        | duck        | G9           | NCBI            |
| KF188265         | Hong Kong       | 1997        | Duck        | Korea        | NCBI            |
| KF188294         | China           | 1994        | Chicken     | G9           | NCBI            |
| KF188366         | Hong Kong       | 1997        | Chicken     | G9           | NCBI            |
| AF218087         | Hong Kong       | 1976        | duck        | P            | NCBI            |
| KF188393         | Hong Kong       | 1976        | duck        | D2           | NCBI            |
| AF523386         | Hong Kong       | 1976        | duck        | P            | NCBI            |
| AF156382         | Hong Kong       | 1977        | duck        | P            | NCBI            |
| AY206674         | Hong Kong       | 1978        | duck        | D2           | NCBI            |
| AF523384         | Hong Kong       | 1978        | duck        | P            | NCBI            |
| AY206672         | Hong Kong       | 1979        | duck        | S            | NCBI            |
| AY206678         | Hong Kong       | 1979        | duck        | D2           | NCBI            |
| AY206679         | Hong Kong       | 1979        | duck        | D2           | NCBI            |
| AY206680         | Hong Kong       | 1979        | duck        | D2           | NCBI            |

|          |             |      |            |    |      |
|----------|-------------|------|------------|----|------|
| CY031267 | Hong Kong   | 1979 | duck       | S  | NCBI |
| CY031275 | Hong Kong   | 1979 | duck       | D2 | NCBI |
| AF218091 | India       | 1986 | duck       | P  | NCBI |
| AY206675 | Hong Kong   | 1988 | quail      | D2 | NCBI |
| AF156381 | Hong Kong   | 1992 | Quail      | P  | NCBI |
| AF384557 | China       | 1994 | chicken    | D2 | NCBI |
| AF156379 | Hong Kong   | 1994 | Chicken    | P  | NCBI |
| AF536689 | China       | 1995 | Chicken    | P  | NCBI |
| AF203008 | South Korea | 1996 | Chicken    | D2 | NCBI |
| AF461526 | China       | 1996 | Chicken    | S  | NCBI |
| AF461527 | China       | 1996 | Chicken    | D2 | NCBI |
| GU053194 | South Korea | 1996 | chicken    | D2 | NCBI |
| KF188387 | South Korea | 1996 | chicken    | D2 | NCBI |
| KF188345 | South Korea | 1996 | chicken    | D2 | NCBI |
| DQ064376 | China       | 1996 | chicken    | D2 | NCBI |
| DQ064377 | China       | 1996 | chicken    | D2 | NCBI |
| AF508574 | China       | 1996 | Quail      | P  | NCBI |
| GU053186 | South Korea | 1996 | chicken    | D2 | NCBI |
| AF536693 | China       | 1996 | Chicken    | P  | NCBI |
| AF156384 | South Korea | 1996 | Chicken    | P  | NCBI |
| AF218105 | Singapore   | 1997 | pekin duck | P  | NCBI |
| AF461530 | China       | 1997 | Chicken    | D2 | NCBI |
| AY330336 | Japan       | 1997 | duck       | P  | NCBI |
| AB432938 | Hong Kong   | 1997 | duck       | D2 | NCBI |

---

|          |              |            |              |    |      |
|----------|--------------|------------|--------------|----|------|
| KY785891 | Hong Kong    | 1997       | quail        | P  | NCBI |
| DQ064380 | China        | 1997       | chicken      | D1 | NCBI |
| DQ064373 | China        | 1997       | duck         | D2 | NCBI |
| AF156375 | Hong Kong    | 1997       | Pigeon       | P  | NCBI |
| AF508564 | China        | 1997       | Chicken      | P  | NCBI |
| DQ064362 | China        | 1997       | chicken      | D2 | NCBI |
| DQ064374 | China        | 1997       | duck         | D2 | NCBI |
| DQ064360 | China        | 1997       | chicken      | D2 | NCBI |
| AB049159 | Japan        | 1997       | parakeet     | D2 | NCBI |
| AF508566 | China        | 1997       | Chicken      | P  | NCBI |
| AF508569 | China        | 1997       | Chicken      | P  | NCBI |
| AB256666 | Japan        | 1997       | chicken      | D2 | NCBI |
| AF536690 | China        | 1997       | Chicken      | P  | NCBI |
| AF536692 | China        | 1997       | Chicken      | P  | NCBI |
| AF156374 | Hong Kong    | 1997       | Chicken      | P  | NCBI |
| KY785896 | Hong Kong    | 1997       | quail        | S  | NCBI |
| JF916713 | China        | 1997-09-13 | Muscovy duck | D1 | NCBI |
| JQ344328 | Malaysia     | 1997-09-24 | duck         | L  | NCBI |
| AF218106 | China        | 1998       | unknown      | P  | NCBI |
| AF218108 | Malaysia     | 1998       | pekin duck   | P  | NCBI |
| AF218109 | Iran         | 1998       | chicken      | P  | NCBI |
| AF218110 | Saudi Arabia | 1998       | chicken      | P  | NCBI |
| AF461510 | China        | 1998       | Chicken      | D2 | NCBI |
| AF461511 | China        | 1998       | chicken      | S  | NCBI |

---

|          |              |      |          |    |      |
|----------|--------------|------|----------|----|------|
| AF461517 | China        | 1998 | Chicken  | D2 | NCBI |
| AF461520 | China        | 1998 | chicken  | D2 | NCBI |
| AY043014 | China        | 1998 | Chicken  | P  | NCBI |
| AY264870 | Iran         | 1998 | chicken  | P  | NCBI |
| AY264876 | Iran         | 1998 | chicken  | P  | NCBI |
| AF508565 | China        | 1998 | Chicken  | P  | NCBI |
| AY345930 | Iran         | 1998 | chicken  | P  | NCBI |
| AY345931 | Iran         | 1998 | chicken  | P  | NCBI |
| AY345932 | Iran         | 1998 | chicken  | P  | NCBI |
| AY345933 | Iran         | 1998 | chicken  | P  | NCBI |
| AY623810 | China        | 1998 | chicken  | P  | NCBI |
| AJ781823 | Pakistan     | 1998 | chicken  | P  | NCBI |
| EU477241 | Iran         | 1998 | chicken  | D2 | NCBI |
| FJ190113 | China        | 1998 | chicken  | S  | NCBI |
| FJ794817 | Iran         | 1998 | chicken  | D2 | NCBI |
| JQ419725 | Iran         | 1998 | chicken  | P  | NCBI |
| KU357035 | Iran         | 1998 | chicken  | S  | NCBI |
| DQ064354 | China        | 1998 | chicken  | D1 | NCBI |
| EU573939 | China        | 1998 | chicken  | D2 | NCBI |
| CY081264 | Saudi Arabia | 1998 | chicken  | S  | NCBI |
| DQ064379 | China        | 1998 | chicken  | S  | NCBI |
| DQ064370 | China        | 1998 | chicken  | D2 | NCBI |
| AB049160 | Japan        | 1998 | parakeet | D2 | NCBI |
| DQ997448 | China        | 1998 | chicken  | P  | NCBI |

---

|          |              |            |                |    |      |
|----------|--------------|------------|----------------|----|------|
| AF536694 | China        | 1998       | Chicken        | P  | NCBI |
| AF536695 | China        | 1998       | Chicken        | P  | NCBI |
| AF536696 | China        | 1998       | Chicken        | P  | NCBI |
| AF536698 | China        | 1998       | Chicken        | P  | NCBI |
| JF795136 | China        | 1998       | chicken        | D1 | NCBI |
| JN381626 | China        | 1998-01    | chicken        | S  | NCBI |
| JQ344326 | Malaysia     | 1998-01-06 | duck           | L  | NCBI |
| KF800947 | Iran         | 1998-02-02 | chicken        | D2 | NCBI |
| KF313568 | China        | 1998-03    | chicken        | S  | NCBI |
| FJ793380 | China        | 1998-04-20 | chicken        | P  | NCBI |
| JX465626 | Iran         | 1998-06    | chicken        | D2 | NCBI |
| GQ497118 | Iran         | 1998-10-26 | chicken        | P  | NCBI |
| GQ497117 | Iran         | 1998-11-15 | chicken        | S  | NCBI |
| AF186268 | Hong Kong    | 1999       | Silkie Chicken | P  | NCBI |
| AF218111 | North Korea  | 1999       | Chicken        | P  | NCBI |
| AF218112 | Iran         | 1999       | chicken        | P  | NCBI |
| AF218113 | Pakistan     | 1999       | chicken        | P  | NCBI |
| AF218114 | Pakistan     | 1999       | chicken        | P  | NCBI |
| AF218116 | Pakistan     | 1999       | chicken        | P  | NCBI |
| AF218117 | Pakistan     | 1999       | chicken        | P  | NCBI |
| AF218119 | Saudi Arabia | 1999       | chicken        | P  | NCBI |
| AF218120 | Saudi Arabia | 1999       | chicken        | P  | NCBI |
| AY036880 | China        | 1999       | chicken        | D1 | NCBI |
| AF461509 | China        | 1999       | chicken        | S  | NCBI |

---

|          |                      |      |                |    |      |
|----------|----------------------|------|----------------|----|------|
| AF461512 | China                | 1999 | Chicken        | S  | NCBI |
| AF461516 | China                | 1999 | Chicken        | S  | NCBI |
| AF461521 | China                | 1999 | Chicken        | S  | NCBI |
| AF461522 | China                | 1999 | chicken        | S  | NCBI |
| AF461528 | China                | 1999 | Chicken        | D2 | NCBI |
| AY206676 | Hong Kong            | 1999 | guinea fowl    | D2 | NCBI |
| AY206677 | Hong Kong            | 1999 | chicken        | D2 | NCBI |
| AY198316 | Iran                 | 1999 | chicken        | P  | NCBI |
| AY198317 | Iran                 | 1999 | chicken        | P  | NCBI |
| AY264875 | Iran                 | 1999 | chicken        | P  | NCBI |
| AY345936 | Iran                 | 1999 | chicken        | P  | NCBI |
| AY330334 | Japan                | 1999 | duck           | P  | NCBI |
| AJ781824 | United Arab Emirates | 1999 | chicken        | P  | NCBI |
| DQ227352 | China                | 1999 | chicken        | S  | NCBI |
| EU477247 | Iran                 | 1999 | chicken        | D2 | NCBI |
| FJ190148 | China                | 1999 | chicken        | D2 | NCBI |
| GQ477293 | China                | 1999 | chicken        | P  | NCBI |
| AF222607 | Hong Kong            | 1999 | Pigeon         | P  | NCBI |
| AF508556 | Pakistan             | 1999 | chicken        | P  | NCBI |
| AF508571 | China                | 1999 | Chicken        | P  | NCBI |
| DQ064364 | China                | 1999 | chicken        | D1 | NCBI |
| AF222611 | Hong Kong            | 1999 | Chicken        | P  | NCBI |
| AF222612 | Hong Kong            | 1999 | Chicken        | P  | NCBI |
| AF222613 | Hong Kong            | 1999 | Silkie Chicken | P  | NCBI |

---

|          |           |            |          |    |      |
|----------|-----------|------------|----------|----|------|
| AF222608 | Hong Kong | 1999       | Chicken  | P  | NCBI |
| AF222610 | Hong Kong | 1999       | pheasant | P  | NCBI |
| DQ064363 | China     | 1999       | chicken  | D1 | NCBI |
| DQ064375 | China     | 1999       | chicken  | D2 | NCBI |
| AF222606 | Hong Kong | 1999       | Quail    | P  | NCBI |
| AF508568 | China     | 1999       | Chicken  | P  | NCBI |
| DQ997505 | China     | 1999       | chicken  | P  | NCBI |
| EF070733 | China     | 1999       | chicken  | S  | NCBI |
| EU081864 | China     | 1999       | chicken  | D1 | NCBI |
| AF536691 | China     | 1999       | chicken  | P  | NCBI |
| AF186269 | Hong Kong | 1999       | Chicken  | P  | NCBI |
| AF536697 | China     | 1999       | chicken  | P  | NCBI |
| HQ117886 | China     | 1999       | chicken  | S  | NCBI |
| AF186267 | Hong Kong | 1999       | Quail    | P  | NCBI |
| DQ681221 | China     | 1999-01    | duck     | S  | NCBI |
| CY077084 | China     | 1999-02-21 | chicken  | D2 | NCBI |
| FJ793436 | China     | 1999-03-10 | chicken  | P  | NCBI |
| HM773438 | China     | 1999-04    | chicken  | D2 | NCBI |
| GQ497120 | Iran      | 1999-08-29 | chicken  | S  | NCBI |
| GQ497119 | Iran      | 1999-10-08 | chicken  | S  | NCBI |
| FJ190112 | China     | 1999-11    | chicken  | S  | NCBI |
| FJ190126 | China     | 1999-11    | chicken  | D1 | NCBI |
| HM773437 | China     | 1999-11    | chicken  | S  | NCBI |
| AF461515 | China     | 2000       | chicken  | S  | NCBI |

---

|          |             |      |         |    |      |
|----------|-------------|------|---------|----|------|
| AF461518 | China       | 2000 | chicken | S  | NCBI |
| AF461519 | China       | 2000 | Chicken | S  | NCBI |
| AF461523 | China       | 2000 | chicken | S  | NCBI |
| AF461529 | China       | 2000 | Chicken | D2 | NCBI |
| AF461531 | China       | 2000 | chicken | S  | NCBI |
| AY198315 | Iran        | 2000 | chicken | P  | NCBI |
| AY198319 | Iran        | 2000 | chicken | P  | NCBI |
| AY198320 | Iran        | 2000 | chicken | P  | NCBI |
| AY198321 | Iran        | 2000 | chicken | P  | NCBI |
| AY264872 | Iran        | 2000 | chicken | P  | NCBI |
| AY264874 | Iran        | 2000 | chicken | P  | NCBI |
| AF523375 | China       | 2000 | Duck    | P  | NCBI |
| AY345926 | Iran        | 2000 | chicken | P  | NCBI |
| AY345928 | Iran        | 2000 | chicken | P  | NCBI |
| AY345929 | Iran        | 2000 | chicken | P  | NCBI |
| AY345934 | Iran        | 2000 | chicken | P  | NCBI |
| AY345935 | Iran        | 2000 | chicken | P  | NCBI |
| AY345940 | Iran        | 2000 | chicken | P  | NCBI |
| AJ536330 | Iran        | 2000 | chicken | P  | NCBI |
| AJ536332 | Iran        | 2000 | chicken | P  | NCBI |
| AY513715 | China       | 2000 | chicken | S  | NCBI |
| AY594194 | China       | 2000 | chicken | P  | NCBI |
| AY768552 | South Korea | 2000 | chicken | P  | NCBI |
| AY768553 | South Korea | 2000 | chicken | P  | NCBI |

---



|          |             |      |         |    |      |
|----------|-------------|------|---------|----|------|
| AY768554 | South Korea | 2000 | chicken | P  | NCBI |
| AY768555 | South Korea | 2000 | chicken | P  | NCBI |
| AY768556 | South Korea | 2000 | chicken | P  | NCBI |
| AY768557 | South Korea | 2000 | chicken | P  | NCBI |
| AY768558 | South Korea | 2000 | chicken | P  | NCBI |
| AJ781825 | Iran        | 2000 | chicken | P  | NCBI |
| DQ104472 | Israel      | 2000 | chicken | P  | NCBI |
| DQ473608 | South Korea | 2000 | chicken | P  | NCBI |
| DQ473609 | South Korea | 2000 | chicken | P  | NCBI |
| DQ473610 | South Korea | 2000 | chicken | P  | NCBI |
| DQ473611 | South Korea | 2000 | chicken | P  | NCBI |
| DQ473612 | South Korea | 2000 | chicken | P  | NCBI |
| DQ473613 | South Korea | 2000 | chicken | P  | NCBI |
| EU477248 | Iran        | 2000 | chicken | D2 | NCBI |
| EU477249 | Iran        | 2000 | chicken | D2 | NCBI |
| FJ357839 | Iran        | 2000 | chicken | P  | NCBI |
| KF188389 | China       | 2000 | Duck    | D1 | NCBI |
| DQ064356 | China       | 2000 | chicken | D1 | NCBI |
| AF523377 | China       | 2000 | Duck    | P  | NCBI |
| AF523382 | China       | 2000 | Duck    | P  | NCBI |
| AY180454 | China       | 2000 | Duck    | P  | NCBI |
| AF523378 | China       | 2000 | Duck    | P  | NCBI |
| AF523380 | China       | 2000 | Duck    | P  | NCBI |
| AY180447 | China       | 2000 | Chicken | P  | NCBI |

---

|          |                      |      |           |    |      |
|----------|----------------------|------|-----------|----|------|
| DQ064358 | China                | 2000 | chicken   | S  | NCBI |
| AF523374 | China                | 2000 | Duck      | P  | NCBI |
| AF523383 | China                | 2000 | Duck      | P  | NCBI |
| AY180451 | China                | 2000 | Duck      | P  | NCBI |
| DQ064355 | China                | 2000 | chicken   | S  | NCBI |
| DQ064365 | China                | 2000 | chicken   | S  | NCBI |
| DQ064372 | China                | 2000 | chicken   | D2 | NCBI |
| AF508567 | China                | 2000 | Chicken   | P  | NCBI |
| AF523372 | China                | 2000 | Duck      | P  | NCBI |
| AF523373 | China                | 2000 | Duck      | P  | NCBI |
| DQ064366 | China                | 2000 | chicken   | S  | NCBI |
| DQ064368 | China                | 2000 | chicken   | D2 | NCBI |
| EF154909 | China                | 2000 | quail     | P  | NCBI |
| EF154910 | China                | 2000 | quail     | P  | NCBI |
| EF154912 | China                | 2000 | quail     | P  | NCBI |
| EF063512 | United Arab Emirates | 2000 | quail     | D2 | NCBI |
| EF154907 | China                | 2000 | quail     | P  | NCBI |
| EF063511 | United Arab Emirates | 2000 | quail     | D2 | NCBI |
| EF620900 | South Korea          | 2000 | unknown   | D2 | NCBI |
| EF154908 | China                | 2000 | quail     | P  | NCBI |
| EF063510 | United Arab Emirates | 2000 | quail     | D2 | NCBI |
| EF154911 | China                | 2000 | quail     | P  | NCBI |
| EF154913 | China                | 2000 | quail     | P  | NCBI |
| CY024120 | China                | 2000 | partridge | P  | NCBI |

---

|          |        |            |                |    |      |
|----------|--------|------------|----------------|----|------|
| CY024296 | China  | 2000       | partridge      | P  | NCBI |
| CY024568 | China  | 2000       | chicken        | P  | NCBI |
| CY024608 | China  | 2000       | chicken        | P  | NCBI |
| CY024624 | China  | 2000       | chicken        | P  | NCBI |
| EU086237 | China  | 2000       | chicken        | S  | NCBI |
| CY023976 | China  | 2000       | Guinea fowl    | P  | NCBI |
| CY024208 | China  | 2000       | partridge      | P  | NCBI |
| CY024616 | China  | 2000       | Silkie Chicken | P  | NCBI |
| CY023091 | China  | 2000       | partridge      | P  | NCBI |
| CY024576 | China  | 2000       | chicken        | P  | NCBI |
| CY024584 | China  | 2000       | chicken        | P  | NCBI |
| CY024592 | China  | 2000       | chicken        | P  | NCBI |
| CY024600 | China  | 2000       | chicken        | P  | NCBI |
| CY024384 | China  | 2000       | partridge      | P  | NCBI |
| EF492221 | Israel | 2000       | chicken        | D2 | NCBI |
| FJ190124 | China  | 2000-02    | chicken        | S  | NCBI |
| CY006018 | China  | 2000-02-17 | quail          | S  | NCBI |
| CY006021 | China  | 2000-02-17 | wild duck      | S  | NCBI |
| GQ497122 | Iran   | 2000-07-19 | chicken        | S  | NCBI |
| GQ497121 | Iran   | 2000-09-14 | chicken        | S  | NCBI |
| DQ485216 | China  | 2000-11-13 | chicken        | D2 | NCBI |
| DQ485224 | China  | 2000-11-20 | chicken        | S  | NCBI |
| HM773441 | China  | 2000-12    | chicken        | S  | NCBI |
| AF461524 | China  | 2001       | Chicken        | S  | NCBI |

---

|          |             |      |         |    |      |
|----------|-------------|------|---------|----|------|
| AF461525 | China       | 2001 | Chicken | S  | NCBI |
| AY083840 | China       | 2001 | Chicken | D2 | NCBI |
| AY083841 | China       | 2001 | Chicken | S  | NCBI |
| AY198313 | Iran        | 2001 | chicken | P  | NCBI |
| AY198318 | Iran        | 2001 | chicken | P  | NCBI |
| AY264873 | Iran        | 2001 | chicken | P  | NCBI |
| AF523379 | China       | 2001 | Duck    | P  | NCBI |
| AY345925 | Iran        | 2001 | chicken | P  | NCBI |
| AY345927 | Iran        | 2001 | chicken | P  | NCBI |
| AY345938 | Iran        | 2001 | chicken | P  | NCBI |
| AY345939 | Iran        | 2001 | chicken | P  | NCBI |
| AJ536331 | Iran        | 2001 | chicken | P  | NCBI |
| AY548499 | Israel      | 2001 | turkey  | P  | NCBI |
| AY548500 | Israel      | 2001 | chicken | P  | NCBI |
| AY548501 | Israel      | 2001 | chicken | P  | NCBI |
| AY594195 | China       | 2001 | chicken | P  | NCBI |
| AY768559 | South Korea | 2001 | chicken | P  | NCBI |
| AJ781827 | China       | 2001 | chicken | P  | NCBI |
| DQ104465 | Israel      | 2001 | chicken | P  | NCBI |
| DQ104469 | Israel      | 2001 | geese   | P  | NCBI |
| DQ473614 | South Korea | 2001 | chicken | P  | NCBI |
| DQ681207 | China       | 2001 | duck    | S  | NCBI |
| DQ681216 | China       | 2001 | duck    | D2 | NCBI |
| FJ190131 | China       | 2001 | chicken | S  | NCBI |

---

|          |             |      |           |    |      |
|----------|-------------|------|-----------|----|------|
| FJ190132 | China       | 2001 | chicken   | D2 | NCBI |
| GQ477290 | China       | 2001 | chicken   | P  | NCBI |
| JX094859 | South Korea | 2001 | chicken   | D2 | NCBI |
| KF188377 | China       | 2001 | duck      | S  | NCBI |
| EU253561 | South Korea | 2001 | chicken   | D2 | NCBI |
| DQ064371 | China       | 2001 | chicken   | D1 | NCBI |
| AB256746 | Japan       | 2001 | chicken   | D1 | NCBI |
| AF523381 | China       | 2001 | wild duck | P  | NCBI |
| DQ064359 | China       | 2001 | chicken   | S  | NCBI |
| DQ064361 | China       | 2001 | chicken   | D1 | NCBI |
| DQ064378 | China       | 2001 | chicken   | S  | NCBI |
| AF523376 | China       | 2001 | Duck      | P  | NCBI |
| AY180444 | China       | 2001 | Chicken   | P  | NCBI |
| AB256682 | Japan       | 2001 | chicken   | D2 | NCBI |
| AB256730 | Japan       | 2001 | chicken   | D2 | NCBI |
| AB256722 | Japan       | 2001 | chicken   | D2 | NCBI |
| DQ064367 | China       | 2001 | chicken   | S  | NCBI |
| AB256674 | Japan       | 2001 | chicken   | D1 | NCBI |
| EF154919 | China       | 2001 | quail     | P  | NCBI |
| EF154923 | China       | 2001 | quail     | P  | NCBI |
| EF154927 | China       | 2001 | quail     | P  | NCBI |
| DQ997460 | China       | 2001 | chicken   | P  | NCBI |
| EF154917 | China       | 2001 | quail     | P  | NCBI |
| EF154922 | China       | 2001 | quail     | P  | NCBI |

---

|          |                      |      |           |    |      |
|----------|----------------------|------|-----------|----|------|
| EF154925 | China                | 2001 | quail     | P  | NCBI |
| EF154926 | China                | 2001 | quail     | P  | NCBI |
| EF154928 | China                | 2001 | quail     | P  | NCBI |
| DQ997474 | China                | 2001 | chicken   | P  | NCBI |
| EF154916 | China                | 2001 | quail     | P  | NCBI |
| EF154918 | China                | 2001 | quail     | P  | NCBI |
| EF154920 | China                | 2001 | quail     | P  | NCBI |
| EF154914 | China                | 2001 | quail     | P  | NCBI |
| EF154924 | China                | 2001 | quail     | P  | NCBI |
| EF154915 | China                | 2001 | quail     | P  | NCBI |
| AB256738 | Japan                | 2001 | chicken   | D2 | NCBI |
| AB256690 | Japan                | 2001 | chicken   | D2 | NCBI |
| AB256698 | Japan                | 2001 | chicken   | D1 | NCBI |
| DQ997465 | China                | 2001 | chicken   | P  | NCBI |
| EF154921 | China                | 2001 | quail     | P  | NCBI |
| EF063513 | United Arab Emirates | 2001 | chicken   | D2 | NCBI |
| CY023096 | China                | 2001 | partridge | P  | NCBI |
| CY023272 | China                | 2001 | partridge | P  | NCBI |
| CY024688 | China                | 2001 | chicken   | P  | NCBI |
| CY024704 | China                | 2001 | chicken   | P  | NCBI |
| CY023928 | China                | 2001 | duck      | P  | NCBI |
| CY023184 | China                | 2001 | partridge | P  | NCBI |
| CY023360 | China                | 2001 | partridge | P  | NCBI |
| CY024632 | China                | 2001 | chicken   | P  | NCBI |

---

|          |          |      |                |    |      |
|----------|----------|------|----------------|----|------|
| CY024696 | China    | 2001 | chicken        | P  | NCBI |
| CY024712 | China    | 2001 | chicken        | P  | NCBI |
| CY023936 | China    | 2001 | duck           | P  | NCBI |
| CY024720 | China    | 2001 | chicken        | P  | NCBI |
| CY024728 | China    | 2001 | chicken        | P  | NCBI |
| CY023104 | China    | 2001 | chicken        | P  | NCBI |
| EU753298 | China    | 2001 | chicken        | S  | NCBI |
| CY024472 | China    | 2001 | partridge      | P  | NCBI |
| CY024560 | China    | 2001 | Guinea fowl    | P  | NCBI |
| CY024648 | China    | 2001 | partridge      | P  | NCBI |
| CY024640 | China    | 2001 | chicken        | P  | NCBI |
| CY024656 | China    | 2001 | chicken        | P  | NCBI |
| CY024664 | China    | 2001 | chicken        | P  | NCBI |
| CY024672 | China    | 2001 | chicken        | P  | NCBI |
| CY024680 | China    | 2001 | Silkie Chicken | P  | NCBI |
| CY023912 | China    | 2001 | duck           | P  | NCBI |
| CY023920 | China    | 2001 | duck           | P  | NCBI |
| EU753306 | China    | 2001 | chicken        | D1 | NCBI |
| EU753314 | China    | 2001 | chicken        | S  | NCBI |
| EU753322 | China    | 2001 | chicken        | S  | NCBI |
| EU753330 | China    | 2001 | chicken        | S  | NCBI |
| EF492233 | Israel   | 2001 | turkey         | D2 | NCBI |
| EU573938 | China    | 2001 | chicken        | S  | NCBI |
| CY073800 | Malaysia | 2001 | duck           | L  | NCBI |

---

|          |        |            |         |    |      |
|----------|--------|------------|---------|----|------|
| FJ190114 | China  | 2001-01    | chicken | S  | NCBI |
| FJ190129 | China  | 2001-02    | chicken | D1 | NCBI |
| KF844248 | China  | 2001-02    | chicken | S  | NCBI |
| FJ190111 | China  | 2001-03    | chicken | S  | NCBI |
| KF313566 | China  | 2001-04    | chicken | S  | NCBI |
| GQ497123 | Iran   | 2001-04-09 | chicken | D2 | NCBI |
| FJ793396 | China  | 2001-04-10 | chicken | P  | NCBI |
| CY006025 | China  | 2001-04-27 | duck    | S  | NCBI |
| FJ190115 | China  | 2001-05    | chicken | S  | NCBI |
| KF746827 | China  | 2001-07-18 | chicken | D2 | NCBI |
| GQ497124 | Iran   | 2001-07-22 | chicken | S  | NCBI |
| FJ190125 | China  | 2001-10    | chicken | D1 | NCBI |
| FJ190127 | China  | 2001-10    | chicken | S  | NCBI |
| FJ190150 | China  | 2001-10    | chicken | S  | NCBI |
| AY738454 | Israel | 2001-12-07 | chicken | D2 | NCBI |
| AB634252 | China  | 2001-12-09 | chicken | S  | NCBI |
| AY281745 | China  | 2002       | chicken | S  | NCBI |
| AY264871 | Iran   | 2002       | chicken | P  | NCBI |
| AY364228 | China  | 2002       | chicken | S  | NCBI |
| AY548510 | Israel | 2002       | turkey  | P  | NCBI |
| AY548512 | Israel | 2002       | turkey  | P  | NCBI |
| AY548513 | Israel | 2002       | turkey  | P  | NCBI |
| AY594196 | China  | 2002       | chicken | P  | NCBI |
| DQ104448 | Israel | 2002       | turkey  | P  | NCBI |

---



|          |        |      |         |    |      |
|----------|--------|------|---------|----|------|
| DQ104449 | Israel | 2002 | turkey  | P  | NCBI |
| DQ104450 | Israel | 2002 | turkey  | P  | NCBI |
| DQ104451 | Israel | 2002 | turkey  | P  | NCBI |
| DQ104452 | Israel | 2002 | turkey  | P  | NCBI |
| DQ104462 | Israel | 2002 | turkey  | P  | NCBI |
| DQ104471 | Israel | 2002 | turkey  | P  | NCBI |
| EU304455 | China  | 2002 | chicken | P  | NCBI |
| EU477246 | Iran   | 2002 | chicken | D2 | NCBI |
| GQ477291 | China  | 2002 | chicken | P  | NCBI |
| GQ477294 | China  | 2002 | chicken | P  | NCBI |
| DQ064357 | China  | 2002 | chicken | D2 | NCBI |
| AB256714 | Japan  | 2002 | chicken | D2 | NCBI |
| DQ064369 | China  | 2002 | chicken | D1 | NCBI |
| AB256706 | Japan  | 2002 | chicken | D2 | NCBI |
| DQ997497 | China  | 2002 | chicken | P  | NCBI |
| DQ997481 | China  | 2002 | chicken | P  | NCBI |
| DQ997490 | China  | 2002 | chicken | P  | NCBI |
| EF154931 | China  | 2002 | quail   | P  | NCBI |
| DQ997187 | China  | 2002 | chicken | P  | NCBI |
| EF154936 | China  | 2002 | quail   | P  | NCBI |
| EF154932 | China  | 2002 | quail   | P  | NCBI |
| EF154934 | China  | 2002 | quail   | P  | NCBI |
| EF154937 | China  | 2002 | quail   | P  | NCBI |
| EF154938 | China  | 2002 | quail   | P  | NCBI |

---

|          |                      |      |           |   |      |
|----------|----------------------|------|-----------|---|------|
| EF154939 | China                | 2002 | quail     | P | NCBI |
| EF063515 | United Arab Emirates | 2002 | chicken   | P | NCBI |
| DQ997451 | China                | 2002 | duck      | P | NCBI |
| EF154935 | China                | 2002 | quail     | P | NCBI |
| EF154930 | China                | 2002 | quail     | P | NCBI |
| CY023888 | China                | 2002 | partridge | P | NCBI |
| CY024048 | China                | 2002 | partridge | P | NCBI |
| CY023128 | China                | 2002 | chicken   | P | NCBI |
| CY023144 | China                | 2002 | chicken   | P | NCBI |
| CY023864 | China                | 2002 | chicken   | P | NCBI |
| CY023944 | China                | 2002 | duck      | P | NCBI |
| CY023800 | China                | 2002 | chukkar   | P | NCBI |
| CY023984 | China                | 2002 | chukkar   | P | NCBI |
| CY024056 | China                | 2002 | partridge | P | NCBI |
| CY023120 | China                | 2002 | chicken   | P | NCBI |
| CY023136 | China                | 2002 | chicken   | P | NCBI |
| CY023856 | China                | 2002 | chicken   | P | NCBI |
| CY023952 | China                | 2002 | duck      | P | NCBI |
| CY023448 | China                | 2002 | partridge | P | NCBI |
| CY023536 | China                | 2002 | chukkar   | P | NCBI |
| CY023624 | China                | 2002 | partridge | P | NCBI |
| CY023712 | China                | 2002 | chukkar   | P | NCBI |
| CY023112 | China                | 2002 | chicken   | P | NCBI |
| CY023848 | China                | 2002 | chicken   | P | NCBI |

---

|          |              |            |         |    |      |
|----------|--------------|------------|---------|----|------|
| CY023960 | China        | 2002       | duck    | P  | NCBI |
| CY023152 | China        | 2002       | chicken | P  | NCBI |
| CY023160 | China        | 2002       | chicken | P  | NCBI |
| CY023768 | China        | 2002       | chicken | P  | NCBI |
| GQ335466 | China        | 2002       | chicken | P  | NCBI |
| EF492237 | Israel       | 2002       | turkey  | D2 | NCBI |
| EF492229 | Israel       | 2002       | turkey  | D2 | NCBI |
| FJ384751 | China        | 2002       | chicken | S  | NCBI |
| GU050554 | Saudi Arabia | 2002       | chicken | D2 | NCBI |
| FJ190123 | China        | 2002-01    | chicken | D2 | NCBI |
| FJ190122 | China        | 2002-02    | chicken | S  | NCBI |
| FJ190128 | China        | 2002-02    | chicken | S  | NCBI |
| FJ190130 | China        | 2002-02    | chicken | S  | NCBI |
| FJ793324 | China        | 2002-02-10 | chicken | P  | NCBI |
| EF462494 | Israel       | 2002-02-17 | chicken | P  | NCBI |
| KF313565 | China        | 2002-03    | duck    | S  | NCBI |
| KJ162124 | China        | 2002-03-20 | chicken | S  | NCBI |
| JN381627 | China        | 2002-04    | chicken | D2 | NCBI |
| JQ710462 | China        | 2002-05    | chicken | D2 | NCBI |
| GU471884 | China        | 2002-05-10 | chicken | D1 | NCBI |
| EF462495 | Israel       | 2002-06-15 | turkey  | P  | NCBI |
| KF374942 | Iran         | 2002-07-31 | chicken | P  | NCBI |
| GQ497125 | Iran         | 2002-08-13 | chicken | P  | NCBI |
| FJ793364 | China        | 2002-08-15 | chicken | P  | NCBI |

---

|          |             |            |         |    |      |
|----------|-------------|------------|---------|----|------|
| FJ793444 | China       | 2002-10-20 | duck    | P  | NCBI |
| GU471885 | China       | 2002-11-04 | chicken | D1 | NCBI |
| FJ793300 | China       | 2002-11-10 | duck    | P  | NCBI |
| GU471882 | China       | 2002-12-02 | chicken | D2 | NCBI |
| GQ497126 | Iran        | 2002-12-05 | chicken | P  | NCBI |
| KY785737 | South Korea | 2002-12-07 | chicken | S  | NCBI |
| KY785745 | South Korea | 2002-12-07 | chicken | P  | NCBI |
| FJ793316 | China       | 2002-12-20 | chicken | P  | NCBI |
| AY336597 | India       | 2003       | chicken | P  | NCBI |
| AY435039 | India       | 2003       | chicken | P  | NCBI |
| AY435040 | India       | 2003       | chicken | P  | NCBI |
| AY548508 | Israel      | 2003       | chicken | P  | NCBI |
| AY548509 | Israel      | 2003       | chicken | P  | NCBI |
| AY664677 | Hong Kong   | 2003       | chicken | P  | NCBI |
| DQ108907 | Israel      | 2003       | chicken | P  | NCBI |
| DQ108915 | Israel      | 2003       | chicken | P  | NCBI |
| DQ104456 | Israel      | 2003       | turkey  | P  | NCBI |
| DQ104457 | Israel      | 2003       | chicken | P  | NCBI |
| DQ104475 | Israel      | 2003       | turkey  | P  | NCBI |
| DQ104476 | Israel      | 2003       | chicken | P  | NCBI |
| DQ104477 | Israel      | 2003       | chicken | P  | NCBI |
| DQ104479 | Israel      | 2003       | chicken | P  | NCBI |
| DQ104481 | Israel      | 2003       | chicken | P  | NCBI |
| DQ104483 | Israel      | 2003       | chicken | P  | NCBI |

---

|          |             |      |          |    |      |
|----------|-------------|------|----------|----|------|
| DQ104485 | Israel      | 2003 | turkey   | P  | NCBI |
| DQ223544 | India       | 2003 | chicken  | P  | NCBI |
| DQ681203 | China       | 2003 | duck     | D1 | NCBI |
| DQ922904 | Iran        | 2003 | chicken  | D2 | NCBI |
| EF063725 | Iran        | 2003 | chicken  | D2 | NCBI |
| EF063726 | Iran        | 2003 | chicken  | D2 | NCBI |
| EF063727 | Iran        | 2003 | chicken  | D2 | NCBI |
| GQ477292 | China       | 2003 | chicken  | P  | NCBI |
| AB538969 | Mongolia    | 2003 | duck     | P  | NCBI |
| HM008896 | China       | 2003 | chicken  | D1 | NCBI |
| HM008897 | China       | 2003 | chicken  | D2 | NCBI |
| HM008898 | China       | 2003 | chicken  | S  | NCBI |
| HM008899 | China       | 2003 | chicken  | D2 | NCBI |
| FN600115 | Iran        | 2003 | garganey | D2 | NCBI |
| JX273542 | India       | 2003 | chicken  | D2 | NCBI |
| JX273553 | Pakistan    | 2003 | chicken  | D2 | NCBI |
| DQ226108 | Hong Kong   | 2003 | Gf       | P  | NCBI |
| DQ226107 | Hong Kong   | 2003 | pheasant | P  | NCBI |
| AY862602 | South Korea | 2003 | duck     | P  | NCBI |
| DQ390215 | Jordan      | 2003 | chicken  | P  | NCBI |
| EF154949 | China       | 2003 | quail    | P  | NCBI |
| EF154942 | China       | 2003 | quail    | P  | NCBI |
| EF154950 | China       | 2003 | quail    | P  | NCBI |
| EF154956 | China       | 2003 | quail    | P  | NCBI |

---

|          |                      |      |           |   |      |
|----------|----------------------|------|-----------|---|------|
| EF154943 | China                | 2003 | quail     | P | NCBI |
| EF154951 | China                | 2003 | quail     | P | NCBI |
| EF154953 | China                | 2003 | quail     | P | NCBI |
| EF063516 | United Arab Emirates | 2003 | chicken   | P | NCBI |
| EF154940 | China                | 2003 | quail     | P | NCBI |
| EF154948 | China                | 2003 | quail     | P | NCBI |
| EF154952 | China                | 2003 | quail     | P | NCBI |
| EF154944 | China                | 2003 | quail     | P | NCBI |
| EF154946 | China                | 2003 | quail     | P | NCBI |
| EF154947 | China                | 2003 | quail     | P | NCBI |
| EF154954 | China                | 2003 | quail     | P | NCBI |
| EF154955 | China                | 2003 | quail     | P | NCBI |
| CY024104 | China                | 2003 | partridge | P | NCBI |
| CY024128 | China                | 2003 | pheasant  | P | NCBI |
| CY024184 | China                | 2003 | chukkar   | P | NCBI |
| CY023192 | China                | 2003 | chicken   | P | NCBI |
| CY023208 | China                | 2003 | chicken   | P | NCBI |
| CY023880 | China                | 2003 | chicken   | P | NCBI |
| CY024096 | China                | 2003 | partridge | P | NCBI |
| CY024112 | China                | 2003 | pheasant  | P | NCBI |
| CY024176 | China                | 2003 | pheasant  | P | NCBI |
| CY024192 | China                | 2003 | pheasant  | P | NCBI |
| CY023200 | China                | 2003 | chicken   | P | NCBI |
| CY023216 | China                | 2003 | chicken   | P | NCBI |

---

|          |        |      |                |    |      |
|----------|--------|------|----------------|----|------|
| CY023872 | China  | 2003 | chicken        | P  | NCBI |
| CY024008 | China  | 2003 | duck           | P  | NCBI |
| CY024136 | China  | 2003 | chukkar        | P  | NCBI |
| CY024144 | China  | 2003 | partridge      | P  | NCBI |
| CY024152 | China  | 2003 | partridge      | P  | NCBI |
| CY024160 | China  | 2003 | pheasant       | P  | NCBI |
| CY023224 | China  | 2003 | chicken        | P  | NCBI |
| CY023232 | China  | 2003 | chicken        | P  | NCBI |
| CY023240 | China  | 2003 | chicken        | P  | NCBI |
| CY023248 | China  | 2003 | Silkie Chicken | P  | NCBI |
| CY023256 | China  | 2003 | chicken        | P  | NCBI |
| CY023968 | China  | 2003 | duck           | P  | NCBI |
| CY023992 | China  | 2003 | duck           | P  | NCBI |
| CY024000 | China  | 2003 | duck           | P  | NCBI |
| CY024064 | China  | 2003 | pheasant       | P  | NCBI |
| CY024072 | China  | 2003 | pheasant       | P  | NCBI |
| CY024080 | China  | 2003 | partridge      | P  | NCBI |
| CY024088 | China  | 2003 | chukkar        | P  | NCBI |
| CY024200 | China  | 2003 | chukkar        | P  | NCBI |
| CY024216 | China  | 2003 | pheasant       | P  | NCBI |
| CY024224 | China  | 2003 | partridge      | P  | NCBI |
| CY023168 | China  | 2003 | chicken        | P  | NCBI |
| CY023176 | China  | 2003 | chicken        | P  | NCBI |
| EF492240 | Israel | 2003 | chicken        | D2 | NCBI |

---

|          |             |      |                |    |      |
|----------|-------------|------|----------------|----|------|
| EF492239 | Israel      | 2003 | chicken        | D2 | NCBI |
| EF492238 | Israel      | 2003 | turkey         | D2 | NCBI |
| DQ226115 | Hong Kong   | 2003 | chicken        | P  | NCBI |
| DQ226109 | Hong Kong   | 2003 | chicken        | P  | NCBI |
| DQ226112 | Hong Kong   | 2003 | chicken        | P  | NCBI |
| DQ226113 | Hong Kong   | 2003 | chicken        | P  | NCBI |
| DQ226111 | Hong Kong   | 2003 | Silkie Chicken | P  | NCBI |
| DQ226114 | Hong Kong   | 2003 | Silkie Chicken | P  | NCBI |
| AY862599 | South Korea | 2003 | chicken        | D2 | NCBI |
| AY664666 | Hong Kong   | 2003 | guineafowl     | S  | NCBI |
| AY664661 | Hong Kong   | 2003 | chicken        | D1 | NCBI |
| AY664662 | Hong Kong   | 2003 | chicken        | D2 | NCBI |
| AY664660 | Hong Kong   | 2003 | chicken        | S  | NCBI |
| AY664663 | Hong Kong   | 2003 | chicken        | S  | NCBI |
| AY664664 | Hong Kong   | 2003 | chicken        | D2 | NCBI |
| AY664665 | Hong Kong   | 2003 | chicken        | D1 | NCBI |
| AY664676 | Hong Kong   | 2003 | chicken        | P  | NCBI |
| AY664668 | Hong Kong   | 2003 | chicken        | D1 | NCBI |
| AY664669 | Hong Kong   | 2003 | chicken        | D2 | NCBI |
| AY664675 | Hong Kong   | 2003 | chicken        | D1 | NCBI |
| AY664678 | Hong Kong   | 2003 | chicken        | P  | NCBI |
| AY790313 | South Korea | 2003 | chicken        | D2 | NCBI |
| AY862601 | South Korea | 2003 | chicken        | P  | NCBI |
| AY862604 | South Korea | 2003 | chicken        | P  | NCBI |

---



|          |             |            |                |    |      |
|----------|-------------|------------|----------------|----|------|
| AY862605 | South Korea | 2003       | chicken        | P  | NCBI |
| AY862606 | South Korea | 2003       | chicken        | D2 | NCBI |
| AY862600 | South Korea | 2003       | chicken        | P  | NCBI |
| AY862603 | South Korea | 2003       | dove           | P  | NCBI |
| AY664674 | Hong Kong   | 2003       | guineafowl     | S  | NCBI |
| AY664673 | Hong Kong   | 2003       | pheasant       | D2 | NCBI |
| AY664672 | Hong Kong   | 2003       | pigeon         | P  | NCBI |
| AY862598 | South Korea | 2003       | Silkie Chicken | P  | NCBI |
| EF462497 | Israel      | 2003-01-05 | turkey         | P  | NCBI |
| FJ190117 | China       | 2003-02    | chicken        | D2 | NCBI |
| EF462498 | Israel      | 2003-02-16 | turkey         | P  | NCBI |
| GU471896 | China       | 2003-02-17 | chicken        | S  | NCBI |
| GU471886 | China       | 2003-03-05 | chicken        | S  | NCBI |
| GU471892 | China       | 2003-03-05 | chicken        | D2 | NCBI |
| MF673351 | Jordan      | 2003-03-05 | chicken        | S  | NCBI |
| MF673375 | Jordan      | 2003-03-08 | chicken        | S  | NCBI |
| FJ793412 | China       | 2003-03-20 | chicken        | P  | NCBI |
| FJ793332 | China       | 2003-03-20 | chicken        | P  | NCBI |
| JF916721 | China       | 2003-04-01 | duck           | S  | NCBI |
| EF462501 | Israel      | 2003-04-02 | turkey         | P  | NCBI |
| GQ497128 | Iran        | 2003-04-14 | chicken        | P  | NCBI |
| CY068643 | India       | 2003-04-14 | chicken        | D2 | NCBI |
| EU665420 | India       | 2003-04-24 | chicken        | D2 | NCBI |
| EU665421 | India       | 2003-04-25 | chicken        | D2 | NCBI |

---

|          |        |            |         |    |      |
|----------|--------|------------|---------|----|------|
| AY738455 | Israel | 2003-05-05 | chicken | D2 | NCBI |
| GU471888 | China  | 2003-05-06 | chicken | S  | NCBI |
| GU471893 | China  | 2003-05-06 | chicken | D1 | NCBI |
| DQ108921 | Israel | 2003-05-12 | chicken | P  | NCBI |
| DQ108906 | Israel | 2003-05-26 | chicken | P  | NCBI |
| KX349955 | China  | 2003-06    | duck    | S  | NCBI |
| DQ108908 | Israel | 2003-07-10 | chicken | P  | NCBI |
| DQ108910 | Israel | 2003-07-14 | chicken | P  | NCBI |
| GQ497127 | Iran   | 2003-07-17 | chicken | S  | NCBI |
| AB634251 | China  | 2003-10-03 | chicken | D1 | NCBI |
| AY738456 | Israel | 2003-10-30 | ostrich | D2 | NCBI |
| MF673367 | Jordan | 2003-11-18 | chicken | S  | NCBI |
| MF673383 | Jordan | 2003-11-18 | chicken | S  | NCBI |
| MF673343 | Jordan | 2003-11-18 | chicken | S  | NCBI |
| KF313560 | China  | 2003-12    | chicken | S  | NCBI |
| DQ104480 | Israel | 2003-12-01 | chicken | P  | NCBI |
| KP865930 | China  | 2003-12-02 | chicken | D1 | NCBI |
| KP865931 | China  | 2003-12-02 | chicken | D2 | NCBI |
| DQ104474 | Israel | 2003-12-04 | chicken | P  | NCBI |
| DQ104482 | Israel | 2003-12-08 | chicken | P  | NCBI |
| MF673319 | Jordan | 2003-12-11 | chicken | S  | NCBI |
| MF673359 | Jordan | 2003-12-11 | chicken | S  | NCBI |
| DQ104484 | Israel | 2003-12-22 | chicken | P  | NCBI |
| DQ108911 | Israel | 2003-12-24 | chicken | P  | NCBI |

---

|          |             |            |         |    |      |
|----------|-------------|------------|---------|----|------|
| DQ108913 | Israel      | 2003-12-28 | turkey  | P  | NCBI |
| DQ108914 | Israel      | 2003-12-31 | chicken | P  | NCBI |
| AY548503 | Israel      | 2004       | chicken | P  | NCBI |
| AY548505 | Israel      | 2004       | turkey  | P  | NCBI |
| AY790314 | South Korea | 2004       | chicken | P  | NCBI |
| AY790315 | South Korea | 2004       | chicken | P  | NCBI |
| AY937403 | China       | 2004       | goose   | P  | NCBI |
| AY937404 | China       | 2004       | goose   | P  | NCBI |
| DQ108905 | Israel      | 2004       | chicken | P  | NCBI |
| DQ108912 | Israel      | 2004       | chicken | P  | NCBI |
| DQ108918 | Israel      | 2004       | turkey  | P  | NCBI |
| DQ108923 | Israel      | 2004       | chicken | P  | NCBI |
| DQ108924 | Israel      | 2004       | turkey  | P  | NCBI |
| DQ108925 | Israel      | 2004       | chicken | P  | NCBI |
| DQ108926 | Israel      | 2004       | turkey  | P  | NCBI |
| DQ108927 | Israel      | 2004       | chicken | P  | NCBI |
| DQ108928 | Israel      | 2004       | chicken | P  | NCBI |
| DQ108929 | Israel      | 2004       | chicken | P  | NCBI |
| DQ108930 | Israel      | 2004       | chicken | P  | NCBI |
| DQ108932 | Israel      | 2004       | turkey  | P  | NCBI |
| DQ225271 | India       | 2004       | chicken | P  | NCBI |
| DQ464352 | South Korea | 2004       | chicken | D2 | NCBI |
| EF063728 | Iran        | 2004       | chicken | D2 | NCBI |
| EF063729 | Iran        | 2004       | chicken | D2 | NCBI |

---

|          |             |      |         |    |      |
|----------|-------------|------|---------|----|------|
| EF063730 | Iran        | 2004 | chicken | D2 | NCBI |
| EF063731 | Iran        | 2004 | chicken | D2 | NCBI |
| EF492241 | Israel      | 2004 | turkey  | D1 | NCBI |
| JX273537 | Jordan      | 2004 | unknown | L  | NCBI |
| JX273544 | Israel      | 2004 | chicken | D2 | NCBI |
| JX273545 | Kuwait      | 2004 | chicken | S  | NCBI |
| JX273546 | Lebanon     | 2004 | chicken | L  | NCBI |
| KF188399 | Pakistan    | 2004 | chicken | D2 | NCBI |
| KF188395 | South Korea | 2004 | chicken | D2 | NCBI |
| KF188309 | South Korea | 2004 | chicken | D2 | NCBI |
| DQ299845 | South Korea | 2004 | chicken | P  | NCBI |
| DQ299837 | South Korea | 2004 | chicken | P  | NCBI |
| DQ299853 | South Korea | 2004 | chicken | P  | NCBI |
| DQ465400 | China       | 2004 | duck    | D1 | NCBI |
| EF154957 | China       | 2004 | quail   | P  | NCBI |
| EF154959 | China       | 2004 | quail   | P  | NCBI |
| EF154960 | China       | 2004 | quail   | P  | NCBI |
| EF154962 | China       | 2004 | quail   | P  | NCBI |
| EF154963 | China       | 2004 | quail   | P  | NCBI |
| EF154967 | China       | 2004 | quail   | P  | NCBI |
| EF154961 | China       | 2004 | quail   | P  | NCBI |
| EF154958 | China       | 2004 | quail   | P  | NCBI |
| EF154964 | China       | 2004 | quail   | P  | NCBI |
| EF154965 | China       | 2004 | quail   | P  | NCBI |

---

|          |       |      |                |   |      |
|----------|-------|------|----------------|---|------|
| EF154966 | China | 2004 | quail          | P | NCBI |
| CY024248 | China | 2004 | chukkar        | P | NCBI |
| CY024264 | China | 2004 | partridge      | P | NCBI |
| CY024328 | China | 2004 | partridge      | P | NCBI |
| CY024344 | China | 2004 | Guinea fowl    | P | NCBI |
| CY024392 | China | 2004 | partridge      | P | NCBI |
| CY024464 | China | 2004 | pheasant       | P | NCBI |
| CY023264 | China | 2004 | chicken        | P | NCBI |
| CY023288 | China | 2004 | Silkie Chicken | P | NCBI |
| CY023344 | China | 2004 | chicken        | P | NCBI |
| CY023368 | China | 2004 | Silkie Chicken | P | NCBI |
| CY023408 | China | 2004 | chicken        | P | NCBI |
| CY023704 | China | 2004 | chicken        | P | NCBI |
| CY024016 | China | 2004 | duck           | P | NCBI |
| CY024032 | China | 2004 | duck           | P | NCBI |
| CY024240 | China | 2004 | pheasant       | P | NCBI |
| CY024256 | China | 2004 | chukkar        | P | NCBI |
| CY024272 | China | 2004 | pheasant       | P | NCBI |
| CY024320 | China | 2004 | pheasant       | P | NCBI |
| CY024336 | China | 2004 | pheasant       | P | NCBI |
| CY024400 | China | 2004 | chukkar        | P | NCBI |
| CY024416 | China | 2004 | Guinea fowl    | P | NCBI |
| CY024480 | China | 2004 | partridge      | P | NCBI |
| CY023280 | China | 2004 | Silkie Chicken | P | NCBI |

---

|          |       |      |                |   |      |
|----------|-------|------|----------------|---|------|
| CY023296 | China | 2004 | chicken        | P | NCBI |
| CY023336 | China | 2004 | chicken        | P | NCBI |
| CY023352 | China | 2004 | chicken        | P | NCBI |
| CY024024 | China | 2004 | duck           | P | NCBI |
| CY024280 | China | 2004 | partridge      | P | NCBI |
| CY024288 | China | 2004 | chukkar        | P | NCBI |
| CY024304 | China | 2004 | partridge      | P | NCBI |
| CY024312 | China | 2004 | chukkar        | P | NCBI |
| CY024432 | China | 2004 | partridge      | P | NCBI |
| CY024440 | China | 2004 | pheasant       | P | NCBI |
| CY024448 | China | 2004 | partridge      | P | NCBI |
| CY024456 | China | 2004 | pheasant       | P | NCBI |
| CY023376 | China | 2004 | chicken        | P | NCBI |
| CY023384 | China | 2004 | chicken        | P | NCBI |
| CY023392 | China | 2004 | chicken        | P | NCBI |
| CY023400 | China | 2004 | Silkie Chicken | P | NCBI |
| CY023696 | China | 2004 | chicken        | P | NCBI |
| CY024232 | China | 2004 | partridge      | P | NCBI |
| CY024352 | China | 2004 | chukkar        | P | NCBI |
| CY024360 | China | 2004 | partridge      | P | NCBI |
| CY024368 | China | 2004 | partridge      | P | NCBI |
| CY024376 | China | 2004 | chukkar        | P | NCBI |
| CY023304 | China | 2004 | Silkie Chicken | P | NCBI |
| CY023312 | China | 2004 | chicken        | P | NCBI |

---

|          |          |            |         |    |      |
|----------|----------|------------|---------|----|------|
| CY023320 | China    | 2004       | chicken | P  | NCBI |
| CY023328 | China    | 2004       | chicken | P  | NCBI |
| CY023896 | China    | 2004       | chicken | P  | NCBI |
| CY023904 | China    | 2004       | chicken | P  | NCBI |
| EF492242 | Israel   | 2004       | chicken | D2 | NCBI |
| EF501983 | Israel   | 2004       | chicken | D2 | NCBI |
| EF492243 | Israel   | 2004       | chicken | D2 | NCBI |
| EU939150 | China    | 2004       | chicken | P  | NCBI |
| EU939151 | China    | 2004       | chicken | P  | NCBI |
| DQ108919 | Israel   | 2004-01-09 | chicken | P  | NCBI |
| DQ108916 | Israel   | 2004-01-13 | turkey  | P  | NCBI |
| CY068651 | India    | 2004-02-23 | chicken | P  | NCBI |
| EU665422 | India    | 2004-03    | chicken | D2 | NCBI |
| KF688983 | China    | 2004-03    | chicken | D2 | NCBI |
| JQ639778 | China    | 2004-03-02 | chicken | D2 | NCBI |
| EF462505 | Israel   | 2004-03-03 | chicken | P  | NCBI |
| FJ793372 | China    | 2004-03-10 | chicken | P  | NCBI |
| CY068659 | India    | 2004-04-12 | chicken | P  | NCBI |
| KX759089 | Pakistan | 2004-04-22 | chicken | S  | NCBI |
| KF746785 | China    | 2004-04-25 | chicken | D2 | NCBI |
| MF673327 | Jordan   | 2004-04-26 | chicken | S  | NCBI |
| MF673303 | Jordan   | 2004-04-26 | chicken | S  | NCBI |
| DQ108920 | Israel   | 2004-05    | turkey  | P  | NCBI |
| CY068667 | India    | 2004-05-25 | chicken | P  | NCBI |

---

|          |              |            |           |    |      |
|----------|--------------|------------|-----------|----|------|
| KX759091 | Pakistan     | 2004-06-02 | chicken   | S  | NCBI |
| KF746835 | China        | 2004-07-04 | chicken   | D2 | NCBI |
| GQ497129 | Iran         | 2004-07-08 | chicken   | P  | NCBI |
| KF313559 | China        | 2004-09    | chicken   | S  | NCBI |
| CY068672 | India        | 2004-09-13 | chicken   | P  | NCBI |
| EU665423 | India        | 2004-10    | chicken   | D2 | NCBI |
| FJ793292 | China        | 2004-10-15 | duck      | P  | NCBI |
| MF673311 | Jordan       | 2004-10-28 | chicken   | S  | NCBI |
| HQ143681 | South Korea  | 2004-11    | wild bird | P  | NCBI |
| GQ497130 | Iran         | 2004-11-08 | chicken   | S  | NCBI |
| FJ793420 | China        | 2004-11-10 | chicken   | P  | NCBI |
| FJ793356 | China        | 2004-11-20 | chicken   | P  | NCBI |
| KP865928 | China        | 2004-12-02 | chicken   | D2 | NCBI |
| EF462507 | Israel       | 2004-12-06 | chicken   | P  | NCBI |
| FJ793340 | China        | 2004-12-15 | chicken   | P  | NCBI |
| DQ108922 | Israel       | 2005       | turkey    | P  | NCBI |
| DQ234277 | China        | 2005       | duck      | P  | NCBI |
| EF063732 | Iran         | 2005       | chicken   | D2 | NCBI |
| EF063733 | Iran         | 2005       | chicken   | D2 | NCBI |
| EF063734 | Iran         | 2005       | chicken   | D2 | NCBI |
| EF063735 | Iran         | 2005       | chicken   | D2 | NCBI |
| EU086264 | China        | 2005       | unknown   | D2 | NCBI |
| EU939152 | China        | 2005       | chicken   | P  | NCBI |
| JX273556 | Saudi Arabia | 2005       | chicken   | D2 | NCBI |

---



|          |                      |      |                       |    |      |
|----------|----------------------|------|-----------------------|----|------|
| KF188403 | Pakistan             | 2005 | chicken               | P  | NCBI |
| KF188371 | United Arab Emirates | 2005 | stone curlew          | P  | NCBI |
| KF188359 | Pakistan             | 2005 | chicken               | D2 | NCBI |
| KF188347 | Pakistan             | 2005 | chicken               | D2 | NCBI |
| KF188337 | United Arab Emirates | 2005 | stone curlew          | D2 | NCBI |
| KF188325 | Pakistan             | 2005 | chicken               | D2 | NCBI |
| KF188323 | China                | 2005 | chicken               | D2 | NCBI |
| KF188311 | United Arab Emirates | 2005 | poultry               | D2 | NCBI |
| KF188260 | United Arab Emirates | 2005 | white bellied bustard | D2 | NCBI |
| KF188258 | United Arab Emirates | 2005 | white bellied bustard | D2 | NCBI |
| KF188254 | United Arab Emirates | 2005 | quail                 | P  | NCBI |
| KF188244 | United Arab Emirates | 2005 | white bellied bustard | P  | NCBI |
| KF188236 | United Arab Emirates | 2005 | white bellied bustard | D2 | NCBI |
| EF154975 | China                | 2005 | quail                 | P  | NCBI |
| EF154978 | China                | 2005 | quail                 | P  | NCBI |
| EF154979 | China                | 2005 | quail                 | P  | NCBI |
| EF154969 | China                | 2005 | quail                 | P  | NCBI |
| EF492228 | Israel               | 2005 | unknown               | D2 | NCBI |
| EF492225 | Israel               | 2005 | chicken               | D2 | NCBI |
| EF492222 | Israel               | 2005 | chicken               | D1 | NCBI |
| EF154970 | China                | 2005 | quail                 | P  | NCBI |
| EF154971 | China                | 2005 | quail                 | P  | NCBI |
| EF154973 | China                | 2005 | quail                 | P  | NCBI |
| EF492232 | Israel               | 2005 | chicken               | D2 | NCBI |

---

|          |        |      |                |    |      |
|----------|--------|------|----------------|----|------|
| EF492236 | Israel | 2005 | chicken        | D1 | NCBI |
| EF492235 | Israel | 2005 | turkey         | D2 | NCBI |
| EF154977 | China  | 2005 | quail          | P  | NCBI |
| EF154972 | China  | 2005 | quail          | P  | NCBI |
| EF492227 | Israel | 2005 | chicken        | D1 | NCBI |
| EF492234 | Israel | 2005 | chicken        | D1 | NCBI |
| EF154974 | China  | 2005 | quail          | P  | NCBI |
| EF154976 | China  | 2005 | quail          | P  | NCBI |
| EF154968 | China  | 2005 | quail          | P  | NCBI |
| EF492226 | Israel | 2005 | turkey         | D2 | NCBI |
| EF492230 | Israel | 2005 | turkey         | S  | NCBI |
| CY024488 | China  | 2005 | pheasant       | P  | NCBI |
| CY024544 | China  | 2005 | partridge      | P  | NCBI |
| CY023424 | China  | 2005 | Silkie Chicken | P  | NCBI |
| CY023440 | China  | 2005 | Silkie Chicken | P  | NCBI |
| CY023488 | China  | 2005 | chicken        | P  | NCBI |
| CY023504 | China  | 2005 | chicken        | P  | NCBI |
| CY023568 | China  | 2005 | chicken        | P  | NCBI |
| CY023584 | China  | 2005 | chicken        | P  | NCBI |
| CY023648 | China  | 2005 | chicken        | P  | NCBI |
| CY023664 | China  | 2005 | chicken        | P  | NCBI |
| CY023728 | China  | 2005 | chicken        | P  | NCBI |
| CY023784 | China  | 2005 | chicken        | P  | NCBI |
| CY023808 | China  | 2005 | chicken        | P  | NCBI |

---

|          |       |      |                |   |      |
|----------|-------|------|----------------|---|------|
| EU086226 | China | 2005 | chicken        | S | NCBI |
| CY024496 | China | 2005 | Guinea fowl    | P | NCBI |
| CY024536 | China | 2005 | pheasant       | P | NCBI |
| CY024552 | China | 2005 | chukkar        | P | NCBI |
| CY023416 | China | 2005 | chicken        | P | NCBI |
| CY023432 | China | 2005 | Silkie Chicken | P | NCBI |
| CY023496 | China | 2005 | chicken        | P | NCBI |
| CY023512 | China | 2005 | chicken        | P | NCBI |
| CY023560 | China | 2005 | chicken        | P | NCBI |
| CY023576 | China | 2005 | chicken        | P | NCBI |
| CY023640 | China | 2005 | chicken        | P | NCBI |
| CY023656 | China | 2005 | chicken        | P | NCBI |
| CY023720 | China | 2005 | chicken        | P | NCBI |
| CY023736 | China | 2005 | chicken        | P | NCBI |
| CY023776 | China | 2005 | chicken        | P | NCBI |
| CY023792 | China | 2005 | chicken        | P | NCBI |
| EU086246 | China | 2005 | unknown        | S | NCBI |
| EU086245 | China | 2005 | chicken        | S | NCBI |
| CY023520 | China | 2005 | chicken        | P | NCBI |
| CY023528 | China | 2005 | chicken        | P | NCBI |
| CY023544 | China | 2005 | chicken        | P | NCBI |
| CY023552 | China | 2005 | chicken        | P | NCBI |
| CY023672 | China | 2005 | chicken        | P | NCBI |
| CY023680 | China | 2005 | chicken        | P | NCBI |

---

|          |        |      |                |    |      |
|----------|--------|------|----------------|----|------|
| CY023688 | China  | 2005 | chicken        | P  | NCBI |
| CY023816 | China  | 2005 | chicken        | P  | NCBI |
| CY023824 | China  | 2005 | chicken        | P  | NCBI |
| CY023832 | China  | 2005 | chicken        | P  | NCBI |
| CY023840 | China  | 2005 | chicken        | P  | NCBI |
| EU086234 | China  | 2005 | duck           | S  | NCBI |
| CY024504 | China  | 2005 | pheasant       | P  | NCBI |
| CY024528 | China  | 2005 | pheasant       | P  | NCBI |
| CY023456 | China  | 2005 | Silkie Chicken | P  | NCBI |
| CY023464 | China  | 2005 | chicken        | P  | NCBI |
| CY023472 | China  | 2005 | chicken        | P  | NCBI |
| CY023480 | China  | 2005 | chicken        | P  | NCBI |
| CY023592 | China  | 2005 | chicken        | P  | NCBI |
| CY023600 | China  | 2005 | chicken        | P  | NCBI |
| CY023608 | China  | 2005 | chicken        | P  | NCBI |
| CY023616 | China  | 2005 | chicken        | P  | NCBI |
| CY023744 | China  | 2005 | chicken        | P  | NCBI |
| CY023752 | China  | 2005 | chicken        | P  | NCBI |
| CY023760 | China  | 2005 | chicken        | P  | NCBI |
| CY024040 | China  | 2005 | duck           | P  | NCBI |
| EU086265 | China  | 2005 | unknown        | D1 | NCBI |
| EU086266 | China  | 2005 | unknown        | D2 | NCBI |
| EF492223 | Israel | 2005 | turkey         | D1 | NCBI |
| EU573940 | China  | 2005 | chicken        | D1 | NCBI |

---

|          |           |            |                     |    |      |
|----------|-----------|------------|---------------------|----|------|
| GQ373069 | China     | 2005       | duck                | P  | NCBI |
| GQ373068 | China     | 2005       | duck                | S  | NCBI |
| GQ373083 | China     | 2005       | chicken             | P  | NCBI |
| KF259061 | Hong Kong | 2005       | chicken             | P  | NCBI |
| KF259062 | Hong Kong | 2005       | chicken             | P  | NCBI |
| KF259063 | Hong Kong | 2005       | chicken             | P  | NCBI |
| KF259064 | Hong Kong | 2005       | chicken             | P  | NCBI |
| KF259065 | Hong Kong | 2005       | chicken             | P  | NCBI |
| KF259066 | Hong Kong | 2005       | pheasant            | P  | NCBI |
| KF259067 | Hong Kong | 2005       | Silkie Chicken      | P  | NCBI |
| FJ793284 | China     | 2005-01-10 | duck                | P  | NCBI |
| FJ793348 | China     | 2005-01-20 | chicken             | P  | NCBI |
| EF462493 | Israel    | 2005-01-23 | turkey              | P  | NCBI |
| HM773435 | China     | 2005-02    | chicken             | S  | NCBI |
| MF673335 | Jordan    | 2005-02-16 | chicken             | S  | NCBI |
| KF313563 | China     | 2005-03    | chicken             | S  | NCBI |
| GU121382 | China     | 2005-03    | black-billed magpie | S  | NCBI |
| KF768240 | China     | 2005-03-10 | duck                | S  | NCBI |
| HM773440 | China     | 2005-04    | chicken             | D1 | NCBI |
| KF746756 | China     | 2005-04-23 | chicken             | D1 | NCBI |
| HM590762 | China     | 2005-05    | black-billed magpie | D2 | NCBI |
| HM590770 | China     | 2005-05    | black-billed magpie | S  | NCBI |
| GU471889 | China     | 2005-05-04 | chicken             | S  | NCBI |
| CY038410 | Pakistan  | 2005-05-18 | chicken             | D2 | NCBI |

---

|          |             |            |           |    |      |
|----------|-------------|------------|-----------|----|------|
| GU722364 | China       | 2005-09-16 | sparrow   | D2 | NCBI |
| KF374947 | Iran        | 2005-09-24 | chicken   | P  | NCBI |
| KF374945 | Iran        | 2005-09-25 | chicken   | P  | NCBI |
| FJ605501 | India       | 2005-10    | watercoot | P  | NCBI |
| KF374943 | Iran        | 2005-10-19 | chicken   | P  | NCBI |
| KF374944 | Iran        | 2005-10-19 | chicken   | P  | NCBI |
| KF374946 | Iran        | 2005-10-19 | chicken   | P  | NCBI |
| GU247901 | South Korea | 2005-10-28 | chicken   | P  | NCBI |
| GU722365 | China       | 2005-11-03 | sparrow   | S  | NCBI |
| GQ497131 | Iran        | 2005-11-08 | chicken   | S  | NCBI |
| KX759093 | Pakistan    | 2005-11-12 | egret     | S  | NCBI |
| KX759095 | Pakistan    | 2005-11-12 | crow      | S  | NCBI |
| KX759097 | Pakistan    | 2005-11-21 | coot      | S  | NCBI |
| HM773433 | China       | 2005-12    | chicken   | S  | NCBI |
| HM773436 | China       | 2005-12    | chicken   | S  | NCBI |
| KY785729 | South Korea | 2005-12-17 | chicken   | S  | NCBI |
| GQ497132 | Iran        | 2005-12-21 | chicken   | P  | NCBI |
| CY038442 | Pakistan    | 2005-12-21 | chicken   | D2 | NCBI |
| CY038418 | Pakistan    | 2005-12-31 | chicken   | D1 | NCBI |
| EU157934 | China       | 2006       | chicken   | D1 | NCBI |
| EU216085 | China       | 2006       | chicken   | D1 | NCBI |
| EU216088 | China       | 2006       | chicken   | S  | NCBI |
| AB538967 | Japan       | 2006       | duck      | P  | NCBI |
| AB538968 | Japan       | 2006       | duck      | P  | NCBI |

---

|          |                      |      |           |    |      |
|----------|----------------------|------|-----------|----|------|
| JX273554 | Pakistan             | 2006 | chicken   | D2 | NCBI |
| JX273555 | Saudi Arabia         | 2006 | chicken   | D2 | NCBI |
| JX273559 | Saudi Arabia         | 2006 | chicken   | D2 | NCBI |
| JX273560 | Saudi Arabia         | 2006 | chicken   | D2 | NCBI |
| JX273563 | China                | 2006 | duck      | S  | NCBI |
| KF188375 | United Arab Emirates | 2006 | quail     | D2 | NCBI |
| KF188329 | United Arab Emirates | 2006 | houbara   | P  | NCBI |
| KF188238 | United Arab Emirates | 2006 | dove      | D2 | NCBI |
| EF492224 | Israel               | 2006 | chicken   | D2 | NCBI |
| EU086303 | China                | 2006 | unknown   | S  | NCBI |
| EU249369 | South Korea          | 2006 | shorebird | P  | NCBI |
| EU086283 | China                | 2006 | quail     | D1 | NCBI |
| EU086284 | China                | 2006 | unknown   | S  | NCBI |
| FJ464730 | Israel               | 2006 | turkey    | D2 | NCBI |
| GQ335471 | China                | 2006 | chicken   | P  | NCBI |
| GQ335495 | China                | 2006 | chicken   | P  | NCBI |
| EU573941 | China                | 2006 | chicken   | D2 | NCBI |
| GU050287 | Saudi Arabia         | 2006 | unknown   | D2 | NCBI |
| GU050295 | Saudi Arabia         | 2006 | unknown   | D2 | NCBI |
| GU050279 | Saudi Arabia         | 2006 | unknown   | D1 | NCBI |
| GQ373075 | China                | 2006 | chicken   | S  | NCBI |
| GQ373071 | China                | 2006 | chicken   | P  | NCBI |
| GQ373082 | China                | 2006 | chicken   | P  | NCBI |
| KF259068 | Hong Kong            | 2006 | chicken   | P  | NCBI |

---

|          |             |            |                |    |      |
|----------|-------------|------------|----------------|----|------|
| KF259069 | Hong Kong   | 2006       | chicken        | P  | NCBI |
| KF259070 | Hong Kong   | 2006       | chicken        | P  | NCBI |
| KF259071 | Hong Kong   | 2006       | chicken        | P  | NCBI |
| KF259072 | Hong Kong   | 2006       | chicken        | P  | NCBI |
| KF259073 | Hong Kong   | 2006       | chicken        | P  | NCBI |
| KF259074 | Hong Kong   | 2006       | chicken        | P  | NCBI |
| KF259075 | Hong Kong   | 2006       | pheasant       | P  | NCBI |
| KF259076 | Hong Kong   | 2006       | Silkie Chicken | P  | NCBI |
| GU247902 | South Korea | 2006-01-17 | chicken        | P  | NCBI |
| KC293797 | Oman        | 2006-01-18 | chicken        | P  | NCBI |
| KC293798 | Oman        | 2006-01-18 | chicken        | P  | NCBI |
| JN543596 | South Korea | 2006-01-19 | chicken        | P  | NCBI |
| KF768215 | China       | 2006-01-25 | duck           | S  | NCBI |
| GU722360 | China       | 2006-02-07 | chicken        | D1 | NCBI |
| GU247914 | South Korea | 2006-02-10 | chicken        | P  | NCBI |
| GU247903 | South Korea | 2006-02-13 | chicken        | P  | NCBI |
| GU247915 | South Korea | 2006-02-17 | chicken        | D2 | NCBI |
| JN540058 | Pakistan    | 2006-02-23 | chicken        | D2 | NCBI |
| HM370056 | India       | 2006-02-25 | chicken        | S  | NCBI |
| HM370049 | India       | 2006-02-25 | chicken        | S  | NCBI |
| JQ710463 | China       | 2006-03    | chicken        | S  | NCBI |
| GU722362 | China       | 2006-04-23 | chicken        | S  | NCBI |
| GU247916 | South Korea | 2006-04-27 | chicken        | P  | NCBI |
| CY038426 | Pakistan    | 2006-05-02 | chicken        | D2 | NCBI |

---



|          |             |            |                |    |      |
|----------|-------------|------------|----------------|----|------|
| JN543597 | South Korea | 2006-05-10 | chicken        | P  | NCBI |
| JN543598 | South Korea | 2006-05-23 | chicken        | P  | NCBI |
| GU247904 | South Korea | 2006-05-25 | chicken        | P  | NCBI |
| GU247905 | South Korea | 2006-05-26 | chicken        | P  | NCBI |
| GU247906 | South Korea | 2006-05-29 | chicken        | P  | NCBI |
| GU471883 | China       | 2006-06-08 | chicken        | S  | NCBI |
| GQ497134 | Iran        | 2006-06-09 | chicken        | P  | NCBI |
| GU471895 | China       | 2006-06-10 | chicken        | S  | NCBI |
| CY038402 | Pakistan    | 2006-06-19 | chicken        | D2 | NCBI |
| FJ190116 | China       | 2006-06-22 | chicken        | S  | NCBI |
| GU722366 | China       | 2006-06-27 | sparrow        | D2 | NCBI |
| FJ190135 | China       | 2006-08-20 | chicken        | D2 | NCBI |
| KC986294 | Bangladesh  | 2006-09    | chicken        | S  | NCBI |
| GU722367 | China       | 2006-09-11 | sparrow        | D2 | NCBI |
| GU722363 | China       | 2006-10-17 | chicken        | S  | NCBI |
| GQ497133 | Iran        | 2006-11-15 | chicken        | S  | NCBI |
| GU247907 | South Korea | 2006-11-22 | chicken        | P  | NCBI |
| AB753177 | Viet Nam    | 2006-12    | Chinese Hwamei | D2 | NCBI |
| KP865927 | China       | 2006-12-02 | chicken        | S  | NCBI |
| KP865929 | China       | 2006-12-02 | chicken        | D1 | NCBI |
| GU247908 | South Korea | 2006-12-08 | chicken        | P  | NCBI |
| FJ464728 | Israel      | 2006-12-10 | chicken        | D2 | NCBI |
| FJ464729 | Israel      | 2006-12-13 | chicken        | D2 | NCBI |
| GU722368 | China       | 2006-12-19 | sparrow        | D1 | NCBI |

---

|          |             |            |         |    |      |
|----------|-------------|------------|---------|----|------|
| KM411633 | China       | 2006-12-23 | chicken | D2 | NCBI |
| FJ464714 | Israel      | 2006-12-26 | chicken | D2 | NCBI |
| JN543599 | South Korea | 2006-12-27 | chicken | P  | NCBI |
| CY038434 | Pakistan    | 2006-12-29 | chicken | D2 | NCBI |
| EU216080 | China       | 2007       | chicken | D1 | NCBI |
| EU216081 | China       | 2007       | chicken | S  | NCBI |
| EU216082 | China       | 2007       | chicken | S  | NCBI |
| EU216083 | China       | 2007       | chicken | S  | NCBI |
| EU216084 | China       | 2007       | chicken | D1 | NCBI |
| EU216086 | China       | 2007       | chicken | S  | NCBI |
| EU216087 | China       | 2007       | chicken | S  | NCBI |
| EU216089 | China       | 2007       | chicken | S  | NCBI |
| EU216090 | China       | 2007       | chicken | S  | NCBI |
| EU216091 | China       | 2007       | chicken | S  | NCBI |
| EU216092 | China       | 2007       | chicken | S  | NCBI |
| EU477242 | Iran        | 2007       | chicken | S  | NCBI |
| EU477243 | Iran        | 2007       | chicken | D1 | NCBI |
| EU477244 | Iran        | 2007       | chicken | S  | NCBI |
| EU477245 | Iran        | 2007       | chicken | D2 | NCBI |
| EU477539 | Iran        | 2007       | chicken | D2 | NCBI |
| EU644482 | China       | 2007       | goose   | S  | NCBI |
| EU644485 | China       | 2007       | chicken | S  | NCBI |
| EU926626 | China       | 2007       | duck    | D2 | NCBI |
| EU939145 | China       | 2007       | chicken | P  | NCBI |

---

HM008887 China

2007

chicken

S

NCBI

---
