# Supplementary material for: Bayesian phylodynamics of avian influenza A virus H9N2 in Asia with time-dependent predictors of migration
Source: PLoS Comput Biol. 2019 Aug 6;15(8):e1007189. doi: 10.1371/journal.pcbi.1007189 (PMC6684064; doi:10.1371/journal.pcbi.1007189)
Supplement: S3 Table — The predictor with BF over 3 was considered as a suggestive support one. The column names except the first two columns showed the name of different migration rates GLM models in this study. In these columns, value 1 in each cell represents the predictor is a suggestive support one in the corresponding model; 0 represents the predictor is not suggestively supported. The total column represents the total times of each predictor was chosen as suggestive support in the 10 GLMs investigated. (PDF) [file pcbi.1007189.s010.pdf]

**S3 Table. Times each predictor was selected with suggestive support in 10 migration rate GLMs.** The predictor with BF over 3 was considered as a suggestive support one. The column names except the first two columns showed the name of different migration rates GLM models in this study. In these columns, value 1 in each cell represents the predictor is a suggestive support one in the corresponding model; 0 represents the predictor is not suggestively supported. The total column represents the total times of each predictor was chosen as suggestive support in the 10 GLMs investigated.

[illegible]
